# Supplementary material
Source: publisher site journal article supplement (https://www.spandidos-publications.com/6961/downloadSupplementary)
Supplement: Supplementary file 1 [file downloadSupplementary]

## Sheet: Sheet1
Table SI. Up-regulated genes 3 h after LIPUS (low-intensity pulsed ultrasound) exposure.
Gene symbol	Fold-change	p value	TPM (Transcripts per million reads)						Gene title
			Ctr-1	Ctr-2	Ctr-3	LIPUS-1	LIPUS-2	LIPUS-3
TADA2B	3.18	0.008	2.086	1.13	0.699	5.147	3.121	4.739	transcriptional adaptor 2B(tada2b)
ZNF418	3.05	0.021	2.326	2.695	1.282	4.754	4.72	10.111	zinc finger protein 418(ZNF418)
ALAS2	2.79	0.015	1.692	1.672	1.382	7.669	3.374	3.28	aminolevulinate, delta-, synthase 2(alas2)
PRKD1	2.74	0.008	1.064	1.873	0.11	3.603	2.674	4.247	protein kinase D1(PRKD1)
IMMP1L	2.51	0.005	1.064	1.842	1.604	3.292	3.356	4.493	inner mitochondrial membrane peptidase subunit 1(immp1l)
CTC1	2.3	0.023	1.433	2.241	0.958	3.046	4.307	2.977	CTS telomere maintenance complex component 1(ctc1)
ROR1	2.19	0.011	0.543	1.536	0.818	1.919	2.743	3.078	receptor tyrosine kinase like orphan receptor 1(ROR1)
RHOBTB1	2.17	0.02	0.739	1.774	0.931	3.445	2.237	2.353	Rho related BTB domain containing 1(RHOBTB1)
SHANK1	2.11	0.043	0.509	2.087	0.865	2.135	3.509	2.617	SH3 and multiple ankyrin repeat domains 1(Shank1)
SLC22A3	2.09	0.001	1.194	1.107	0.235	2.458	1.936	2.535	solute carrier family 22 member 3(SLC22A3)
MYSM1	2.07	0.009	2.003	1.543	2.642	3.597	4.211	4.768	Myb-like, SWIRM and MPN domains 1(mysm1)
GABRP	2.06	0.003	0.915	0.228	0.476	1.802	1.814	2.691	gamma-aminobutyric acid type A receptor subunit pi(GABRP)
ZNF24	2.05	0.008	0.395	1.231	1.242	1.903	3.169	2.194	zinc finger protein 24(ZNF24)
LOC6733590	2.01	0.005	4.544	5.496	5.205	12.462	10.732	7.888	peptidoglycan-recognition protein SC2(LOC6733590)
EGFL7	2	0.017	2.181	3.912	4.046	6.661	6.548	6.369	EGF-like-domain, multiple 7(Egfl7)
TNFRSF11B	1.95	0.038	19.654	32.265	14.121	36.567	42.625	42.663	TNF receptor superfamily member 11b(TNFRSF11B)
ZDHHC15A	1.94	0.007	1.007	1.193	0.629	1.719	2.714	1.885	zinc finger DHHC-type palmitoyltransferase 15a(zdhhc15a)
NIPA1	1.91	0.047	2.015	0.065	0.664	2.047	2.927	2.354	non imprinted in Prader-Willi/Angelman syndrome 1 homolog (human)(Nipa1)
MBLAC1.S	1.85	0.003	1.334	1.659	1.291	2.503	3.047	2.371	metallo-beta-lactamase domain containing 1 S homeolog(mblac1.S)
DACT2	1.84	0.02	3.003	5.075	3.218	5.835	7.878	6.679	dishevelled binding antagonist of beta catenin 2(DACT2)
TRIM16L	1.83	0.029	5.594	3.559	3.417	7.189	6.11	9.43	tripartite motif containing 16 like(TRIM16L)
EHMT2	1.81	0.011	1.872	1.871	2.631	4.319	3.095	4.087	euchromatic histone lysine methyltransferase 2(EHMT2)
TASL	1.8	0.048	2.742	1.458	2.82	4.618	4.2	3.404	TLR adaptor interacting with endolysosomal SLC15A4(TASL)
RAVER1	1.77	0.001	0.859	1.237	1.326	2.048	2.058	2.17	ribonucleoprotein, PTB-binding 1(Raver1)
GTF3C6	1.77	0.045	4.425	4.939	3.102	10.063	6.411	5.801	general transcription factor IIIC, polypeptide 6, alpha(Gtf3c6)
HSP90AA1	1.76	0.001	12.632	13.161	13.035	20.656	22.266	25.864	heat shock protein 90 alpha family class A member 1(HSP90AA1)
FOXO1B	1.75	0.037	2.825	4.144	5.336	5.849	7.561	7.613	forkhead box O1 b(foxo1b)
PDCD2L	1.74	0.028	2.36	2.686	1.605	3.249	4.566	3.598	programmed cell death 2-like(PDCD2L)
MAPK11	1.73	0.041	3.212	2.98	4.452	4.37	7.491	6.7	mitogen-activated protein kinase 11(MAPK11)
SOX14	1.71	0.042	4.659	3.541	3.491	8.268	7.574	4.627	SRY-box transcription factor 14(sox14)
ADRB2	1.69	0.023	10.59	7.028	6.436	12.608	12.241	14.978	adrenoceptor beta 2(ADRB2)
WDR24	1.69	0.032	1.06	1.481	1.409	2.601	2.496	1.631	WD repeat domain 24(wdr24)
HYPK	1.68	0.004	5.125	4.89	6.637	9.923	8.618	9.276	huntingtin interacting protein K(Hypk)
BBS4	1.68	0.001	0.89	1.154	0.84	1.795	1.883	1.62	Bardet-Biedl syndrome 4(BBS4)
STC	1.68	0.033	1.123	1.841	1.422	2.066	3.002	2.246	Stanniocalcin(stc)
CCDC85CA	1.68	0.005	1.122	0.477	1.391	1.769	2.026	2.055	coiled-coil domain containing 85C, a(ccdc85ca)
TLR7	1.68	0.001	1.059	0.342	0.228	1.658	1.678	1.796	toll-like receptor 7(Tlr7)
IRF6	1.66	0.032	49.784	86.107	58.126	117.821	94.543	101.987	interferon regulatory factor 6(IRF6)
RASD1	1.66	0.042	3.879	4.907	2.579	6.487	5.873	5.864	ras related dexamethasone induced 1(RASD1)
FOXI1.L	1.65	0.036	0.784	1.645	1.001	1.69	2.101	2.099	forkhead box I1 L homeolog(foxi1.L)
FGF8A	1.65	0.014	1.265	0.83	1.519	2.085	2.278	1.818	fibroblast growth factor 8a(fgf8a)
TOB2	1.65	0.043	2.943	3.234	4.431	5.882	4.418	7.27	transducer of ERBB2, 2(TOB2)
MTERF1	1.65	0.021	1.035	1.341	1.064	2.1	1.45	2.158	mitochondrial transcription termination factor 1(MTERF1)
RBP7	1.63	0.035	7.272	7.357	5.638	11.887	8.155	13.497	retinol binding protein 7, cellular(Rbp7)
B3GNT7	1.62	0.023	2.467	2.851	3.03	3.843	5.937	3.97	UDP-GlcNAc:betaGal beta-1,3-N-acetylglucosaminyltransferase 7(B3GNT7)
P2RY12	1.62	0.004	1.2	0.935	1.029	1.743	1.523	1.974	purinergic receptor P2Y12(P2ry12)
RNASEH2A	1.62	0.039	1.463	2.286	1.541	2.282	3.317	2.879	ribonuclease H2 subunit A(RNASEH2A)
V-RYK	1.59	0.009	7.704	9.025	8.858	12.842	11.703	16.421	Tyrosine-protein kinase transforming protein RYK(V-RYK)
XKR9	1.58	0.01	1.851	2.049	1.996	3.519	2.49	3.385	XK-related protein 9(xkr9)
SHQ1	1.58	0.004	5.414	6.799	6.074	10.06	10.219	8.514	SHQ1, H/ACA ribonucleoprotein assembly factor(shq1)
COMMD4	1.58	0.039	3.159	3.433	3.619	5.424	4.004	7.059	COMM domain containing 4(Commd4)
CGNB	1.56	0.044	12.922	20.353	19.051	22.436	31.379	27.173	cingulin b(cgnb)
WEE1.S	1.55	0.006	8.052	7.397	5.842	11.103	11.138	10.544	WEE1 G2 checkpoint kinase S homeolog(wee1.S)
CRYBG2	1.55	0.031	20.994	26.933	17.393	38.783	31.651	29.663	crystallin beta-gamma domain containing 2(CRYBG2)
MET	1.54	0.014	1.602	1.75	1.248	2.089	2.548	2.397	MET proto-oncogene, receptor tyrosine kinase(MET)
MMP15	1.53	0.043	10.674	16.549	13.736	24.992	19.945	17.569	matrix metallopeptidase 15(Mmp15)
ZNF567	1.53	0.024	3.943	4.904	4.857	6.481	8.675	5.936	zinc finger protein 567(ZNF567)
CA4	1.52	0.04	1.709	1.157	1.847	2.083	2.411	2.579	carbonic anhydrase 4(CA4)
HOXA3A	1.52	0.016	1.709	1.771	2.072	3.252	2.946	2.294	homeobox A3a(hoxa3a)
ALCAMA	1.52	0.039	12.805	21.115	14.033	23.193	23.732	24.052	activated leukocyte cell adhesion molecule a(alcama)
EXOG	1.52	0.015	2.504	3.377	3.636	4.694	4.614	4.949	Nuclease EXOG, mitochondrial(exog)
BAG3	1.51	0.036	3.136	5.176	4.207	6.499	6.322	5.772	BAG cochaperone 3(BAG3)
PHYHD1	1.51	0.031	5.698	7.488	6.428	8.36	9.171	12.404	phytanoyl-CoA dioxygenase domain containing 1(phyhd1)
ARHGAP11A	1.51	0.024	1.105	1.502	1.218	1.861	2.288	1.644	Rho GTPase activating protein 11A(ARHGAP11A)
BORCS7	1.5	0.02	1.184	1.192	0.624	1.899	1.866	1.357	BLOC-1 related complex subunit 7(borcs7)
DMWD	1.5	0.005	2	2.189	2.192	3.498	2.743	3.404	DM1 locus, WD repeat containing(DMWD)
LIN37	1.49	0.036	3.691	5.207	3.63	6.503	5.219	6.779	lin-37 DREAM MuvB core complex component(LIN37)
EDAR	1.48	0.031	0.851	1.03	1.177	1.231	1.848	1.731	ectodysplasin A receptor(edar)
TMEM68	1.48	0.007	2.305	2.774	2.804	3.893	3.478	4.267	transmembrane protein 68(TMEM68)
DMBT1	1.48	0.006	14.235	15.946	13.973	25.231	19.993	20.209	deleted in malignant brain tumors 1(DMBT1)
CFD.L	1.47	0.013	11.583	9.758	8.234	13.781	14.147	15.298	complement factor D L homeolog(cfd.L)
GRCC10	1.47	0.026	6.289	5.581	5.863	8.969	6.946	10.58	gene rich cluster, C10 gene(grcc10)
ZNF227	1.47	0.037	1.038	0.938	1.405	1.435	1.96	1.646	zinc finger protein 227(ZNF227)
TIMM10	1.47	0.016	3.93	4.457	5.043	6.119	7.722	5.935	translocase of inner mitochondrial membrane 10 homolog (yeast)(timm10)
SOAT1	1.47	0.007	1.969	2.088	2.441	2.817	3.433	3.273	sterol O-acyltransferase 1(Soat1)
SERGEF	1.47	0.038	1.164	1.485	1.297	2.047	1.516	2.278	secretion regulating guanine nucleotide exchange factor(SERGEF)
ELOVL7	1.47	0.05	137.624	164.468	99.893	178.577	208.424	191.11	ELOVL fatty acid elongase 7(ELOVL7)
MRPS11	1.46	0.026	5.227	7.621	6.359	10.058	8.319	9.374	mitochondrial ribosomal protein S11(MRPS11)
NME4	1.45	0.038	1.002	1.463	1.346	1.748	1.643	2.116	NME/NM23 nucleoside diphosphate kinase 4(NME4)
SORBS1	1.45	0.004	4.785	5.535	5.019	7.961	6.574	7.793	sorbin and SH3 domain containing 1(Sorbs1)
GLIPR1L1	1.44	0.001	0.995	1.02	0.408	1.516	1.352	1.481	GLIPR1 like 1(GLIPR1L1)
IER3	1.44	0.044	68.437	60.434	47.908	80.188	73.431	99.874	immediate early response 3(IER3)
AP5M1	1.44	0.019	2.496	2.54	2.331	2.922	4.201	3.565	adaptor related protein complex 5 subunit mu 1(AP5M1)
RILPL2	1.43	0.037	3.425	4.592	4.252	4.793	6.303	6.526	Rab interacting lysosomal protein-like 2(rilpl2)
MYCBP	1.43	0.016	12.369	17.008	14.337	22.56	19.664	19.941	MYC binding protein(MYCBP)
METTL5	1.43	0.017	2.661	2.201	2.459	3.981	2.96	3.538	methyltransferase 5, N6-adenosine(mettl5)
HLTF	1.42	0.011	2.593	2.221	2.252	3.201	3.866	3.015	helicase like transcription factor(HLTF)
BICDL1	1.42	0.034	10.17	11.476	8.82	16.525	11.872	15.011	BICD family like cargo adaptor 1(Bicdl1)
AT3G19020	1.42	0.003	8.247	9.923	9.088	12.041	13.588	12.996	Leucine-rich repeat (LRR) family protein(AT3G19020)
TMEM17	1.42	0.007	3.591	4.182	4.06	5.117	5.355	6.337	transmembrane protein 17(tmem17)
CCR7	1.42	0.038	27.117	30.965	39.909	40.789	46.823	49.747	C-C motif chemokine receptor 7(CCR7)
MSTO1	1.42	0.036	1.015	1.546	1.202	1.681	1.737	1.83	misato mitochondrial distribution and morphology regulator 1(msto1)
CEBPB	1.41	0.021	119.966	156.616	111.054	176.088	177.891	187.107	CCAAT/enhancer binding protein beta(CEBPB)
SLC25A16	1.41	0.044	5.773	4.838	4.14	7.839	5.791	7.13	solute carrier family 25 member 16(SLC25A16)
POLB	1.41	0.034	5.857	5.47	7.295	7.782	8.185	10.203	polymerase (DNA directed), beta(polb)
NUP43	1.41	0.006	5.605	5.14	4.966	8.336	6.762	7.045	nucleoporin 43(Nup43)
SSTR5	1.4	0.04	1.143	1.184	1.018	1.967	1.356	1.423	somatostatin receptor 5(Sstr5)
HSPA14	1.4	0.006	6.653	7.47	5.903	9.832	8.906	9.215	heat shock protein 14(hspa14)
ZDHHC21	1.4	0.019	3.109	2.74	2.705	3.681	3.613	4.765	zinc finger DHHC-type palmitoyltransferase 21(zdhhc21)
NAA25	1.4	0.039	13.119	19.73	14.52	22.588	20.926	21.803	N-alpha-acetyltransferase 25, NatB auxiliary subunit(NAA25)
PPARG	1.39	0.001	5.393	4.976	5.256	7.307	6.7	7.82	peroxisome proliferator activated receptor gamma(PPARG)
CSF1RA	1.39	0.007	14.237	13.737	12.774	21.176	18.761	16.871	colony stimulating factor 1 receptor, a(csf1ra)
METTL13	1.39	0.032	0.748	1.284	0.629	1.761	1.389	1.406	methyltransferase 13, eEF1A lysine and N-terminal methyltransferase(mettl13)
TMEM135.L	1.38	0.035	1.676	1.735	2.272	2.283	2.747	2.796	transmembrane protein 135 L homeolog(tmem135.L)
CXCR4	1.37	0.043	6.137	7.135	8.154	10.003	8.259	11.174	C-X-C motif chemokine receptor 4(Cxcr4)
PIGC	1.37	0.016	2.636	3.049	3.472	4.17	3.862	4.468	phosphatidylinositol glycan anchor biosynthesis class C(PIGC)
TAF6L	1.37	0.025	1.849	2.152	2.513	3.013	3.154	2.692	TATA-box binding protein associated factor 6 like(Taf6l)
AAR2	1.37	0.006	2.29	2.749	2.309	3.231	3.542	3.232	AAR2 splicing factor(AAR2)
RAMP2	1.36	0.042	2.921	3.57	4.363	5.08	4.836	4.712	receptor activity modifying protein 2(Ramp2)
FNIP1	1.36	0.031	13.908	19.813	15.138	21.713	22.022	22.155	folliculin interacting protein 1(FNIP1)
PLGRKT	1.36	0.009	7.057	6.393	7.459	10.65	8.84	9.046	plasminogen receptor with a C-terminal lysine(Plgrkt)
TMEM267	1.36	0.017	3.738	3.419	4.072	4.881	4.592	5.83	transmembrane protein 267(tmem267)
PLK3	1.36	0.006	28.014	33.069	27.608	42.213	37.838	40.131	polo like kinase 3(PLK3)
PDS5A	1.36	0.014	14.552	12.625	15.463	21.21	19.212	17.386	PDS5 cohesin associated factor A(pds5a)
STARD10	1.35	0.032	40.362	39.104	29.176	47.322	47.956	50.394	START domain containing 10(Stard10)
BSPRY	1.35	0.035	4.706	4.61	3.631	5.312	5.512	6.618	B-box and SPRY domain containing(Bspry)
NCL	1.35	0.043	260.418	382.453	322.465	442.399	408.75	433.695	nucleolin(NCL)
TMEM231	1.35	0.017	1.312	1.305	1.66	2.023	1.844	1.857	transmembrane protein 231(tmem231)
SNX9	1.35	0.042	34.493	39.36	48.738	50.109	59.311	54.207	sorting nexin 9(Snx9)
CNN1	1.35	0.039	14.273	10.053	10.603	15.305	15.637	15.477	calponin 1(CNN1)
TAMALIN	1.35	0.02	7.61	7.469	8.206	9.143	10.178	12.197	trafficking regulator and scaffold protein tamalin(TAMALIN)
MC1R	1.34	0.003	2.554	2.374	2.721	3.321	3.658	3.261	melanocortin 1 receptor(MC1R)
CRIP2	1.34	0.015	10.763	11.063	12.819	16.793	15.884	13.717	cysteine-rich protein 2(Crip2)
COL26A1	1.33	0.001	17.505	18.322	19.012	23.976	26.09	23.099	collagen, type XXVI, alpha 1(Col26a1)
DNAJC17	1.33	0.026	1.362	1.829	1.46	1.948	2.074	2.116	DnaJ heat shock protein family (Hsp40) member C17(DNAJC17)
XPNPEP1	1.33	0.041	17.027	19.444	17.154	22.085	21.009	28.771	X-prolyl aminopeptidase 1(Xpnpep1)
PHLDA2	1.33	0.033	41.273	49.277	39.764	64.027	49.813	59.461	pleckstrin homology-like domain, family A, member 2(phlda2)
RFK	1.32	0.016	14.392	15.73	12.216	19.587	18.586	17.664	riboflavin kinase(RFK)
CACNB3	1.32	0.045	0	0.809	0.373	1.571	1.083	1.364	calcium voltage-gated channel auxiliary subunit beta 3(Cacnb3)
XRCC3	1.32	0.031	1.55	2.066	1.749	2.285	2.577	2.201	X-ray repair cross complementing 3(XRCC3)
CHN2	1.32	0.007	8.595	9.232	7.86	11.613	11.933	10.376	chimerin 2(CHN2)
SLC7A5	1.32	0.01	8.868	9.653	7.938	10.786	11.791	12.313	solute carrier family 7 member 5(Slc7a5)
TRIB1	1.32	0.027	12.414	13.733	10.7	17.225	14.467	16.792	tribbles pseudokinase 1(Trib1)
CXCR4.S	1.32	0.026	6.531	7.953	8.022	11.084	9.383	9.177	C-X-C motif chemokine receptor 4 S homeolog(cxcr4.S)
RSL1D1	1.32	0.037	44.365	44.181	33.123	55.102	50.653	53.164	ribosomal L1 domain containing 1(RSL1D1)
SDC2	1.32	0.047	13.207	16.849	15.989	17.42	20.45	22.761	syndecan 2(Sdc2)
APLNRB	1.31	0.009	0.869	0.799	1.059	1.319	1.503	1.208	apelin receptor b(aplnrb)
RAMP1	1.31	0.003	5.558	5.619	5.615	6.997	8.067	6.957	receptor activity modifying protein 1(Ramp1)
G6PC3	1.31	0.045	0.617	1.217	1.148	1.494	1.247	1.671	glucose-6-phosphatase catalytic subunit 3(g6pc3)
ALG2	1.31	0.012	3.339	3.685	3.142	4.158	4.219	4.902	ALG2 alpha-1,3/1,6-mannosyltransferase(ALG2)
TRAF4	1.3	0.001	22.385	23.544	24.021	30.599	30.756	29.702	TNF receptor associated factor 4(Traf4)
SQSTM1	1.3	0.002	126.206	138.697	132.287	177.789	160.509	178.43	sequestosome 1(Sqstm1)
LOXL3A	1.3	0.04	18.924	22.268	20.775	31.243	23.417	26.068	lysyl oxidase-like 3a(loxl3a)
PIK3R4	1.3	0.041	4.718	3.989	5.376	5.537	6.207	6.405	phosphoinositide-3-kinase, regulatory subunit 4(Pik3r4)
TIPARP	1.29	0.019	23.289	30.094	27.861	34.977	34.486	34.973	TCDD-inducible poly(ADP-ribose) polymerase(Tiparp)
HEATR1	1.29	0.033	7.305	8.589	6.356	9.602	9.811	9.116	HEAT repeat containing 1(heatr1)
NDUFS4	1.29	0.036	14.28	13.134	12.799	16.853	20.287	15.114	NADH:ubiquinone oxidoreductase subunit S4(NDUFS4)
GNG7	1.29	0.031	14.227	15.46	13.851	16.251	18.712	21.554	G protein subunit gamma 7(GNG7)
SNRPB2	1.29	0.04	13.594	12.051	10.036	16.242	14.631	14.815	U2 small nuclear ribonucleoprotein B(Snrpb2)
PPP2R3A	1.29	0.01	11.035	12.648	13.576	16.039	16.346	15.466	protein phosphatase 2 regulatory subunit B''alpha(PPP2R3A)
FKTN	1.29	0.021	2.364	2.978	2.477	3.542	3.314	3.178	fukutin(Fktn)
MARS2	1.29	0.016	1.879	1.818	1.942	2.777	2.268	2.252	methionyl-tRNA synthetase 2, mitochondrial(mars2)
GPRC5C	1.29	0.044	57.092	60.261	44.376	67.113	71.919	67.579	G protein-coupled receptor, family C, group 5, member C(Gprc5c)
MRPS27	1.29	0.04	4.813	5.862	4.487	6.759	5.872	6.787	mitochondrial ribosomal protein S27(Mrps27)
CDK2	1.29	0.048	4.803	4.602	3.647	6.128	5.389	5.191	cyclin-dependent kinase 2(cdk2)
CDS1	1.28	0.026	9.424	11.646	9.625	14.153	12.862	12.204	CDP-diacylglycerol synthase 1(Cds1)
PHLDA3	1.28	0.003	6.277	6.395	5.853	8.231	7.331	8.185	pleckstrin homology-like domain, family A, member 3(phlda3)
NELFE	1.28	0.039	5.239	7.126	5.775	7.556	7.664	7.81	negative elongation factor complex member E(NELFE)
CLDN3	1.28	0.004	62.973	58.934	56.946	76.556	71.11	80.802	claudin 3(CLDN3)
RASSF7	1.27	0.015	45.588	41.103	41.028	51.632	60.775	50.723	Ras association (RalGDS/AF-6) domain family (N-terminal) member 7(Rassf7)
PFDN1	1.27	0.031	17.424	17.265	14.705	22.989	18.619	21.357	prefoldin subunit 1(pfdn1)
SNIP1	1.27	0.018	8.922	9.884	7.78	11.176	11.292	11.122	Smad nuclear interacting protein 1(SNIP1)
BCL2L1	1.27	0.002	24.095	26.102	23.55	32.485	30.169	30.884	BCL2 like 1(BCL2L1)
ZDHHC18B	1.26	0.043	2.069	2.028	1.996	2.959	2.183	2.616	zinc finger DHHC-type palmitoyltransferase 18b(zdhhc18b)
NCKAP1	1.26	0.036	28.926	34.23	26.438	37.809	39.562	35.099	NCK-associated protein 1(nckap1)
ALKBH5	1.26	0.026	13.307	15.763	14.654	18.991	19.736	16.397	alkB homolog 5, RNA demethylase(alkbh5)
AK5	1.26	0.015	4.05	4.684	4.121	5.886	5.198	5.104	adenylate kinase 5(Ak5)
AP3S1	1.26	0.029	28.39	34.769	28.392	37.736	36.089	41.033	adaptor-related protein complex 3, sigma 1 subunit(Ap3s1)
TGFB3	1.26	0.035	41.708	50.178	50.663	53.767	61.882	63.519	transforming growth factor beta 3(TGFB3)
SPTLC3	1.26	0.045	6.054	8.004	7.544	8.7	8.852	9.452	serine palmitoyltransferase long chain base subunit 3(SPTLC3)
PNO1	1.26	0.037	42.296	44.779	46.737	55.053	49.474	64.586	partner of NOB1 homolog(pno1)
ALKBH1	1.26	0.004	3.628	3.277	3.306	4.304	4.036	4.496	alkB homolog 1, histone H2A dioxygenase(Alkbh1)
HMGCR	1.25	0.05	32.969	43.902	36.446	44.31	47.271	49.59	3-hydroxy-3-methylglutaryl-CoA reductase(HMGCR)
PRR5L	1.25	0.026	5.798	5.866	6.686	8.496	7.063	7.365	proline rich 5 like(PRR5L)
NDUFB11	1.25	0.028	11.882	14.173	11.834	16.236	14.407	16.506	NADH:ubiquinone oxidoreductase subunit B11(NDUFB11)
IRF3	1.25	0.024	6.85	6.724	5.565	7.912	7.625	8.218	interferon regulatory factor 3(Irf3)
SLC25A27	1.24	0.034	0.873	0.755	0.696	1.157	1.144	1.446	solute carrier family 25 member 27(SLC25A27)
STOML2	1.24	0.003	6.311	6.315	5.85	7.872	7.858	7.2	stomatin like 2(STOML2)
UQCRH	1.24	0.015	46.128	48.601	47.475	65.093	58.187	53.495	ubiquinol-cytochrome c reductase hinge protein(Uqcrh)
PGAP4	1.24	0.019	2.623	2.923	2.787	3.483	3.109	3.745	post-GPI attachment to proteins GalNAc transferase 4(PGAP4)
JADE3	1.24	0.036	4.857	5.985	5.528	7.321	6.661	6.244	jade family PHD finger 3(jade3)
ATP5MC1	1.24	0.018	8.253	8.133	7.212	10.568	9.092	9.536	ATP synthase membrane subunit c locus 1(ATP5MC1)
BRAP	1.24	0.047	3.2	3.271	3.99	4.669	4.157	4.057	BRCA1 associated protein(Brap)
HS3ST1	1.24	0.036	17.428	21.925	20.595	23.849	23.76	26.184	heparan sulfate-glucosamine 3-sulfotransferase 1(HS3ST1)
HSD3B7	1.23	0.021	29.132	25.088	28.208	36.834	31.591	33.348	hydroxy-delta-5-steroid dehydrogenase, 3 beta- and steroid delta-isomerase 7(Hsd3b7)
BTBD6A	1.23	0.044	5.347	4.669	5.749	5.892	7.072	6.478	BTB (POZ) domain containing 6a(btbd6a)
ACSL4	1.23	0.045	106.614	119.626	91.126	133.671	129.835	125.496	acyl-CoA synthetase long-chain family member 4(Acsl4)
MKNK1	1.23	0.03	15.015	18.421	16.008	19.107	21.596	19.974	MAP kinase interacting serine/threonine kinase 1(mknk1)
AGA	1.23	0.046	4.111	4.91	3.754	5.328	5.142	5.135	aspartylglucosaminidase(AGA)
CYP2J3	1.23	0.006	4.516	4.479	5.116	5.76	5.648	5.904	cytochrome P450, family 2, subfamily j, polypeptide 3(Cyp2j3)
ZGC:162879	1.23	0.033	9.133	9.046	9.439	10.127	12.874	11.058	zgc:162879(zgc:162879)
INCENP.L	1.23	0.006	1	1.106	0.839	1.322	1.201	1.288	inner centromere protein L homeolog(incenp.L)
RAB3D	1.23	0.032	11.469	12.438	10.311	13.022	15.164	13.745	RAB3D, member RAS oncogene family(Rab3d)
POGLUT1	1.22	0.022	3.053	2.519	2.64	3.479	3.333	3.218	protein O-glucosyltransferase 1(Poglut1)
MRPL9	1.22	0.046	6.035	5.689	4.701	6.67	6.416	6.897	mitochondrial ribosomal protein L9(MRPL9)
PURH	1.22	0.01	16.813	18.375	16.221	19.618	21.914	21.307	bifunctional phosphoribosylaminoimidazolecarboxamide formyltransferase/IMP cyclohydrolase(purH)
DNASE1L3	1.22	0.036	21.332	20.783	17.407	24.86	22.628	25.016	deoxyribonuclease 1 like 3(DNASE1L3)
NFKBIE	1.22	0.033	29.391	35.222	33.47	43.546	37.998	38.16	nuclear factor of kappa light polypeptide gene enhancer in B cells inhibitor, epsilon(Nfkbie)
KAT8	1.22	0.02	11.631	11.18	13.006	14.989	13.468	15.264	lysine acetyltransferase 8(Kat8)
ANKK1	1.22	0.018	5.632	6.747	5.883	7.489	7.626	7.117	ankyrin repeat and kinase domain containing 1(Ankk1)
SELENOT1B	1.22	0.01	9.307	8.977	9.28	10.721	12.289	10.642	selenoprotein T, 1b(selenot1b)
ZNF668	1.22	0.023	1.548	1.781	1.767	1.961	2.242	2.004	zinc finger protein 668(ZNF668)
TBL2	1.22	0.032	3.964	4.845	4.256	5.586	5.334	4.96	transducin (beta)-like 2(Tbl2)
PARD6A	1.22	0.046	13.209	13.582	11.212	16.111	13.97	16.144	par-6 family cell polarity regulator alpha(PARD6A)
OSBPL2	1.22	0.034	18.832	16.981	16.633	21.496	23.234	19.105	oxysterol binding protein-like 2(Osbpl2)
PLA2G15	1.21	0.026	11.357	11.926	10.694	12.859	13.06	15.146	phospholipase A2 group XV(PLA2G15)
CCT6A	1.2	0.012	67.671	75.298	66.938	88.147	79.662	84.693	chaperonin containing TCP1 subunit 6A(CCT6A)
